# Supplementary material for: Expression of distinct maternal and somatic 5.8S, 18S, and 28S rRNA types during zebrafish development
Source: PubMed Central journal article supplement (PMC5513064; doi:10.1261/rna.061515.117), 2017-08
Supplement: supp_061515.117_Supplemental_Fig_S1.pdf [file supp_061515.117_Supplemental_Fig_S1.pdf]

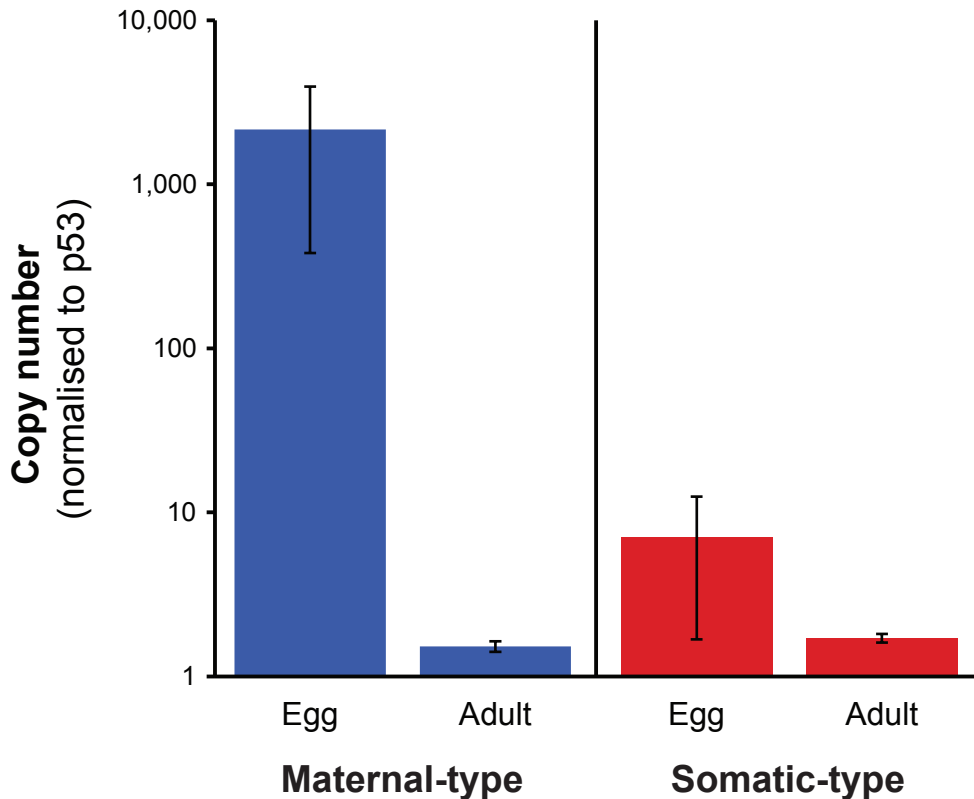

### Supplementary Figure S1

Relative copy number of maternal- and somatic-type 45S rDNA in single eggs and adult-male whole-body, calculated as  $2^{\Delta C_t}$  to the reference gene (p53). Data represent means  $\pm$  Standard Error.
