# Supplementary material for: Expression of distinct maternal and somatic 5.8S, 18S, and 28S rRNA types during zebrafish development
Source: PubMed Central journal article supplement (PMC5513064; doi:10.1261/rna.061515.117), 2017-08
Supplement: supp_061515.117_Supplemental_Fig_S2.pdf [file supp_061515.117_Supplemental_Fig_S2.pdf]

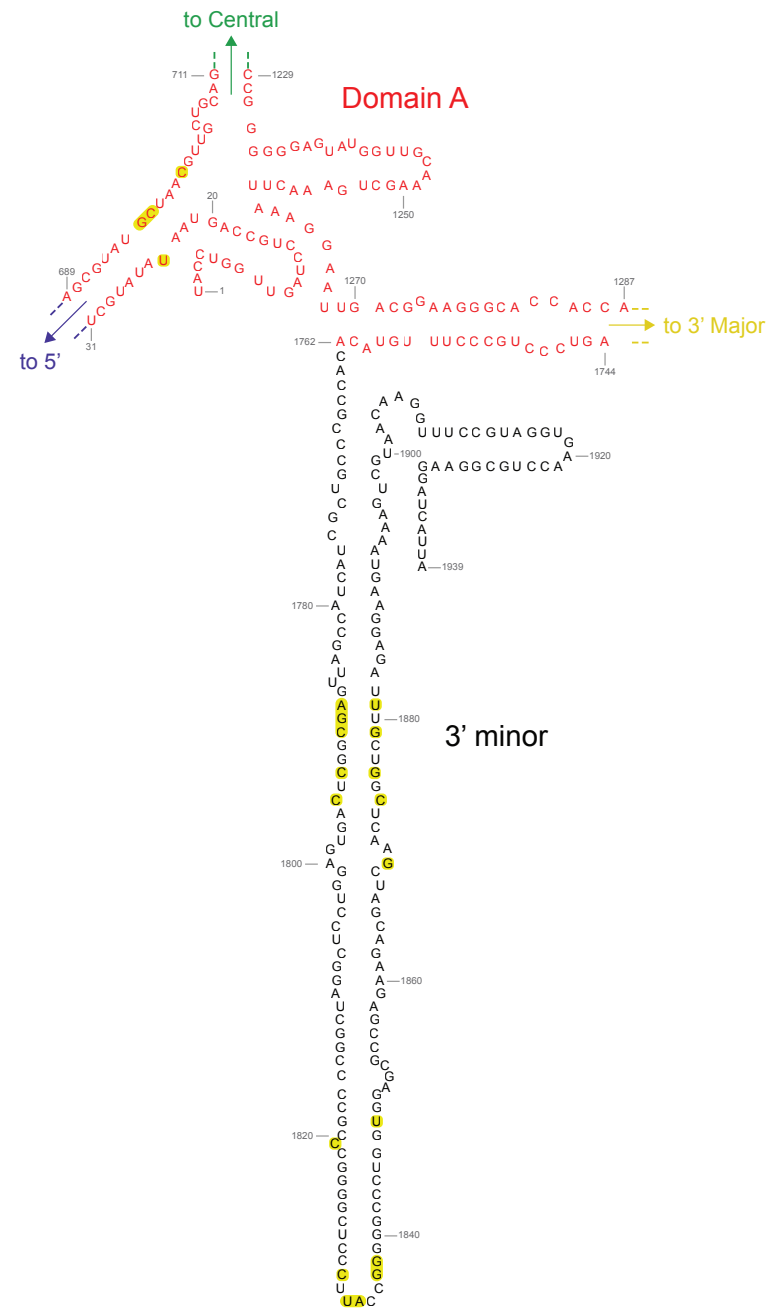

Maternal-type 18S

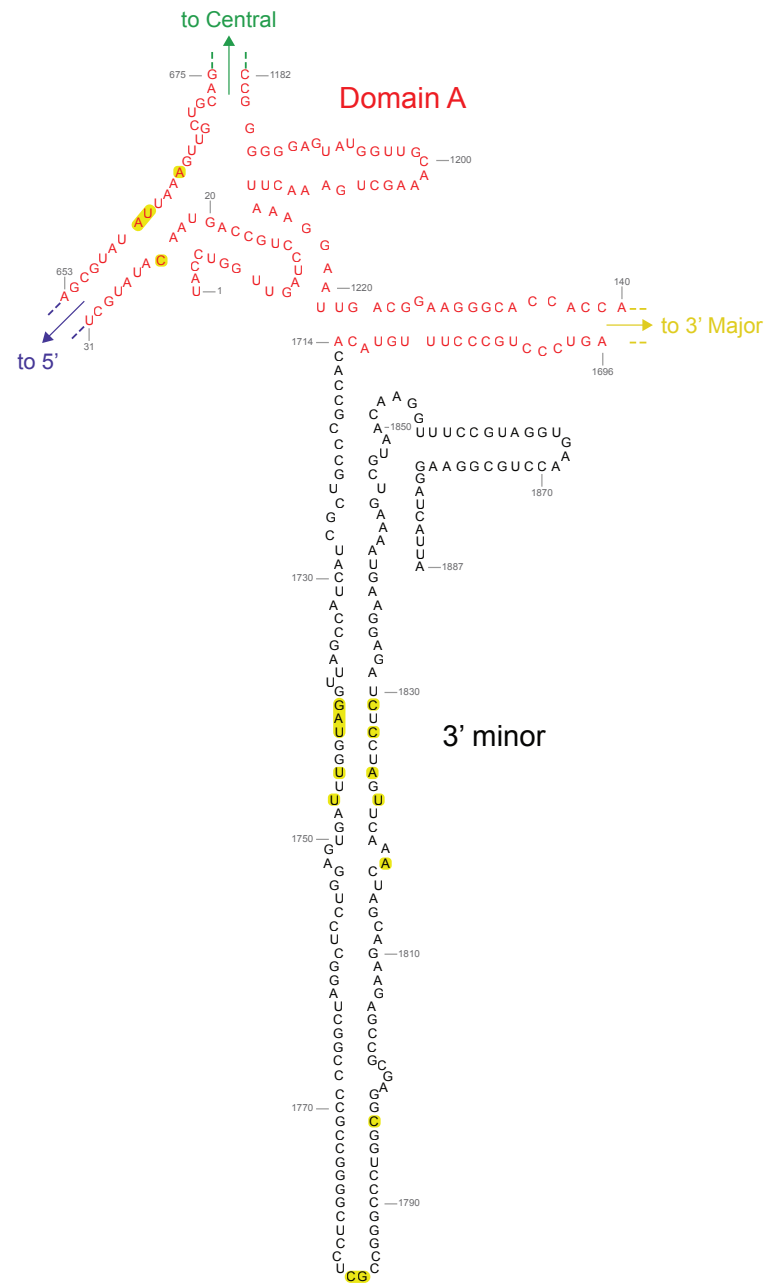

Somatic-type 18S

## Supplementary Figure S2

The putative secondary structures for maternal- and somatic-type 18S rRNA Domain A (red) and 3' minor (black). The nucleotides that differ between the two types are marked (yellow).
