# Supplementary material for: Expression of distinct maternal and somatic 5.8S, 18S, and 28S rRNA types during zebrafish development
Source: PubMed Central journal article supplement (PMC5513064; doi:10.1261/rna.061515.117), 2017-08
Supplement: supp_061515.117_Supplemental_Fig_S3.pdf [file supp_061515.117_Supplemental_Fig_S3.pdf]

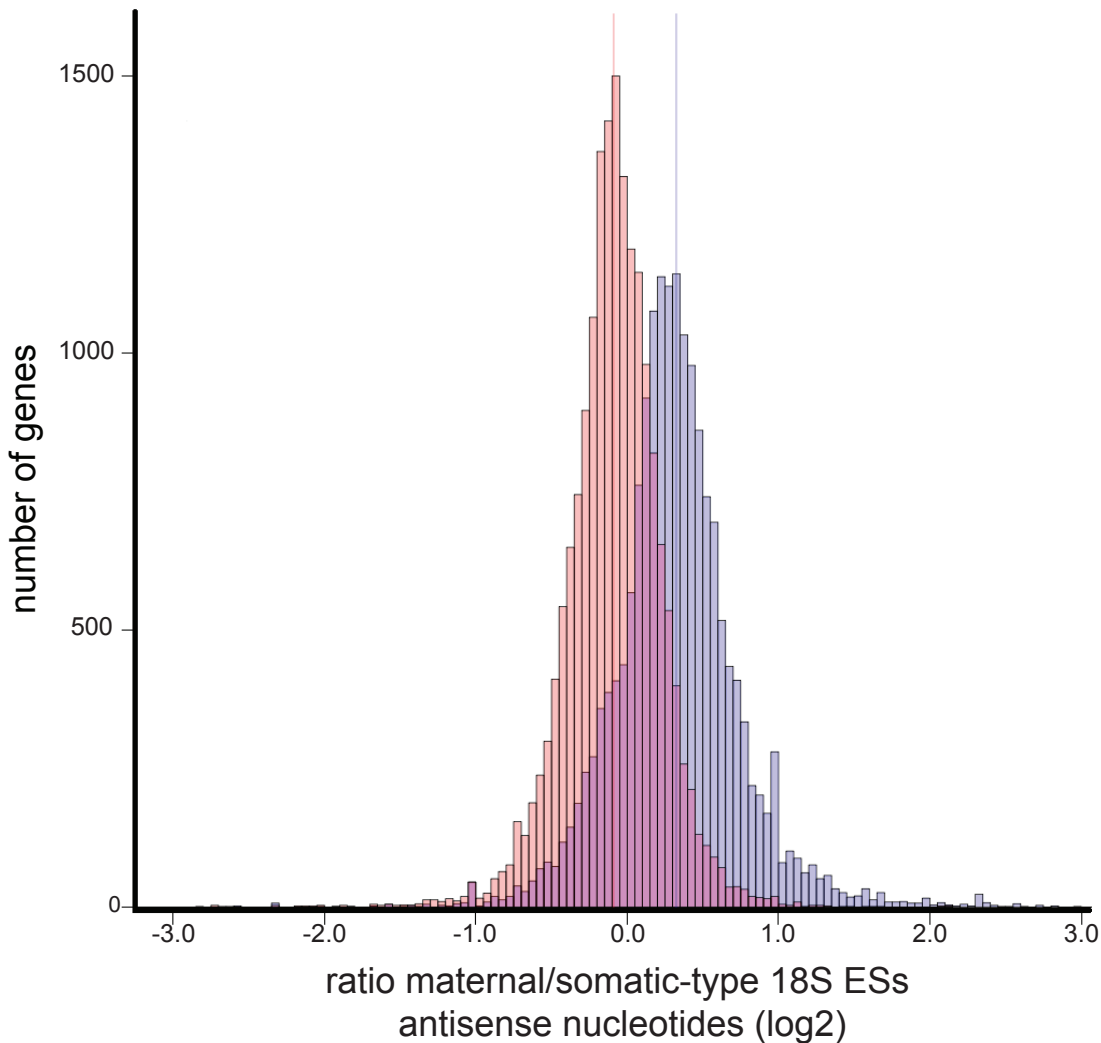

### Supplementary Figure S3

The distributions of the per gene (non-equal) ratio of maternal/somatic-type 18S ESs nucleotides that are antisense to the 5'UTR of mRNA (red: ES6; blue: ES3).
