# Supplementary material for: Expression of distinct maternal and somatic 5.8S, 18S, and 28S rRNA types during zebrafish development
Source: PubMed Central journal article supplement (PMC5513064; doi:10.1261/rna.061515.117), 2017-08
Supplement: supp_061515.117_Supplemental_Fig_S4.pdf [file supp_061515.117_Supplemental_Fig_S4.pdf]

Gel 1

Gel 2

Gel 3

Gel 4

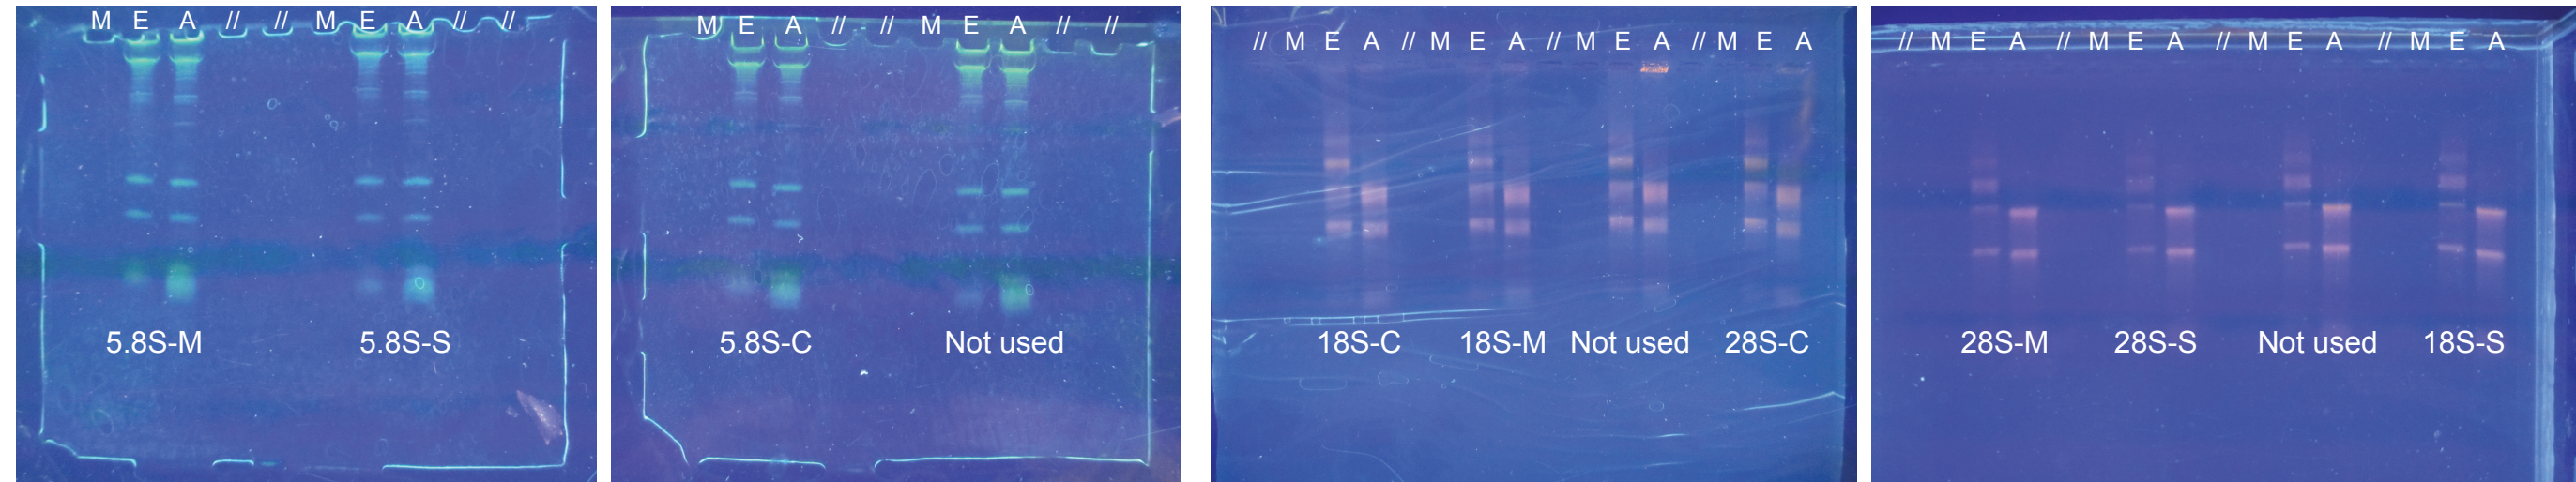

### Supplementary Figure S4

The electrophoresis gels that were used in the Northern blots showed in Figure 1C. M= marker, E= egg; A= adult-male whole-body; ||= no RNA.
