# Supplementary material for: Expression of distinct maternal and somatic 5.8S, 18S, and 28S rRNA types during zebrafish development
Source: PubMed Central journal article supplement (PMC5513064; doi:10.1261/rna.061515.117), 2017-08
Supplement: supp_061515.117_Supplemental_File_S1.pdf [file supp_061515.117_Supplemental_File_S1.pdf]

**Supplementary File S1:** Sequence comparison of the 18S (pp. 2-3), 5.8S (p. 4) and 28S (pp. 5-8) rRNA variant types coming from all the genomic 45S rDNA units (Supplementary Table 3A). Nucleotides identical to the first row (45-M) are indicated as dots, while gaps are expressed as dashes.

# 18S

```

                20          40          60          80          100          120
45S-M 18S TACCTGGTTGATCCTGCCAGTAATATATGCTTGTCTCAAAGATTAAGCCATGCAAGTCTAAGTGCACACGGCCGGTACAGTGAAACTGCGAATGGCTCATTAAATCAGTTATGGTTCCTTTGATCGCTCC 130
45S-U1 18S .....A..... 130
45S-U2 18S .....A..... 130
45S-U3 18S .....A..... 130
45S-S 18S .....C.....G..... 130

                140          160          180          200          220          240          260
45S-M 18S ACCCGGTTACTTGGATAACTGTGGCAATTCAGAGCTAATACATGCCAACGAGCGCCGACCTGGGCCGCCCTTCTCCCCTCG-G-GGCGGGG-GG-TGGGTACCCGGGGACGCGTGCATTTATCAGATC 255
45S-U1 18S T.....CTAT.T.....T.GG.....C..... 260
45S-U2 18S T.....CTAT.T.....T.GG.....C.T..... 260
45S-U3 18S T.....CTAT.T.....T.GG.....C.....C..... 260
45S-S 18S T.....C..... 231

                280          300          320          340          360          380
45S-M 18S CAAAACCCATGCGGGTGCGGGGCGGTGGAGAGGGGGGCGCTCGCGCCTACCCGCCGCCCTCCGCCCCCGCCTCGCTTTGGTGACTCTAGATAACCTCGGGCCGATCGCGCGCCCTC-GCGGCGGCGACG 384
45S-U1 18S .....A..... 389
45S-U2 18S .....T.....A..... 389
45S-U3 18S .....A.....A.....A..... 389
45S-S 18S .....C.....CTCCC-.....G.GG.....GG.....T.....C..... 348

                400          420          440          460          480          500          520
45S-M 18S GTTCATTGGAATGTCTGCCCTATCAACTTTCGATGGTAGGTCCGTGCGCTACCATGGTGACCACGGGTGACGGGAATCAGGTTTCGATTCCGGAGAGGGAGCCTGAGAAACGGCTACCACATCCAAGGA 514
45S-U1 18S ..... 519
45S-U2 18S ..... 519
45S-U3 18S .....CT.TA.G.....A..... 519
45S-S 18S A..... 478

                540          560          580          600          620          640
45S-M 18S AGGCAGCAGGCGCGCAAATACCCATTTCCGACACGGAGAGGTAGTGACGAAAAATAACAATGCAGGTCTCTTTTCGAGGCCCTGCAATTGGAATGAGTGCATCCCAAACCCATGGGCGAGGACCCATTGG 644
45S-U1 18S .....C.....T.....C.T.....T..... 649
45S-U2 18S .....C.....T.....C.T.....T..... 649
45S-U3 18S .....C.....T.....C.T.....T..... 649
45S-S 18S .....C.....G.....A.....T.....C.T.....T..... 608

                660          680          700          720          740          760          780
45S-M 18S AGGGCAAGTCTGGTGCCAGCAGCCCGGTAATTCAGCTCCAATAGCGTATGCTAACGTTGCTGCAGTTAAAAAGCTCGTAGTTGGATCTCGGGGACCAGGGCCGCGCGGTCCGCCGAGGGCAGCCACC 774
45S-U1 18S .....T..... 779
45S-U2 18S .....T..... 779
45S-U3 18S .....T..... 779
45S-S 18S .....AT..A.....AGT-..T..... 736

                800          820          840          860          880          900
45S-M 18S GCCGGTCCCGGACCCCAAGGCTCCCGCGCCCCCGGATGCCCTTGACTGGGTGTCT- CGGCTTGGGGCCCGAGCGTTTACTTTGAAAAAATTAGAGTGTTCAAGGCAGGGCCGGCACC GCGCCCCA 903
45S-U1 18S .....T.....T.....TT 906
45S-U2 18S .....T.....TT 906
45S-U3 18S .....T.....T.....TT 906
45S-S 18S T.....T.....AG.....GGTAC..C.....A.....C..AGC.G..G 860

                920          940          960          980          1,000          1,020          1,040
45S-M 18S TTGAATACCCAGCTAGGAATAATGGAATAGGACCCCGTTCTATTTTCTGTGGGTTTCCGGAACCCGGGCCATGATCGAGAGGGACGCCGGGGGCATTTCGATTGCGCCGCTAGAGGTGAAATTCCT 1033
45S-U1 18S A.....T..... 1036
45S-U2 18S A.....T..... 1036
45S-U3 18S A.....T..... 1036
45S-S 18S C.....G.....T.....T..... 988

                1,060          1,080          1,100          1,120          1,140          1,160
45S-M 18S GGACCGGCGCAAGACGGACCGGAGCGAAAGCGTTTCCAAAGAACGTTTTTCATTAATCAAGAACGAAAGTCGGAGGTTTCGAAGACGATCAGATACCGTCGTAGTTCGACCGTAAACGATGCCGACCCGCG 1163
45S-U1 18S .....T..... 1166
45S-U2 18S .....T..... 1166
45S-U3 18S .....T..... 1166
45S-S 18S .....GAA.....A.....T..... 1118
```



# 5.8S

```

                20           40           60           80           100           120
45S-M 5.8S - AACTCTTAGCGGTGGATCACTCGGCTCGTGCATGAAGAACGCAGCTAGCTGCGAGAACTAATGTGAATTGCAGGACACACATTGATCATCGACCTTTCGAACGCACATTGCGGCCCGGGTCCAT 129
45S-U1 5.8S C.....C.....C.....C.....C.....AC.....T.....T.C. 128
45S-U2 5.8S C.....C.....C.....C.....C.....AC.....T.....T.C. 128
45S-U3 5.8S C.....C.....C.....C.....C.....AC.....T.....T.C. 128
45S-S 5.8S C.....C.....C.....C.....C.....AC.....T.....T.C. 128

                140
45S-M 5.8S CCCGGGGCCACGCCTGTCTGAGGGTCGCC 158
45S-U1 5.8S .....C.....T 157
45S-U2 5.8S .....C.....T 157
45S-U3 5.8S T.....C.....T 157
45S-S 5.8S .....C.....T 157
```



# 28S

|            |                                                                                                                                             |                                                                                         |        |         |        |               |                    |      |
|------------|---------------------------------------------------------------------------------------------------------------------------------------------|-----------------------------------------------------------------------------------------|--------|---------|--------|---------------|--------------------|------|
|            | 1,180                                                                                                                                       | 1,200                                                                                   | 1,220  | 1,240   | 1,260  | 1,280         | 1,300              |      |
| 45S-M 28S  | <b>GGAAACTCTGGTGGAGGCCCGCCGCGTCTGACGTGCAAAATCGGTCGTC</b>                                                                                    | <b>CGACCTGGGCATAGGGGCGAAAGACTAATCGAACCATCTAGTAGCTGGTTCCCTCCGAAGTTTCCCTCAGGATAGCTGGC</b> |        |         |        |               |                    | 1288 |
| 45S-U1 28S | .....                                                                                                                                       | TA.....                                                                                 | .....  | T.....  | .....  | A.....        | .....              | 1245 |
| 45S-U2 28S | .....                                                                                                                                       | TA.....                                                                                 | .....  | T.....  | .....  | A.....        | .....              | 1245 |
| 45S-U3 28S | .....                                                                                                                                       | TA.....                                                                                 | .....  | T.....  | .....  | A.....        | .....              | 1245 |
| 45S-S 28S  | .....                                                                                                                                       | A.....                                                                                  | .....  | T.....  | .....  | .....         | .....              | 1278 |
|            | 1,320                                                                                                                                       | 1,340                                                                                   | 1,360  | 1,380   | 1,400  | 1,420         |                    |      |
| 45S-M 28S  | <b>GCTCGCCGATCAAGCAGTTTTATCCGGTAAAGCCAATGACTAGAGGCCCTTGGGGCCGAAACGGCCTCAACCTATTCTCAAACCTTTAAATGGGTAAGAGGCCCGGCTCGCTGGCGCTGGAGCCGGGCGTGG</b> |                                                                                         |        |         |        |               |                    | 1418 |
| 45S-U1 28S | .....                                                                                                                                       | AT.....                                                                                 | .....  | G.....  | .....  | A.....        | A.....T.....       | 1370 |
| 45S-U2 28S | .....                                                                                                                                       | AT.....                                                                                 | .....  | G.....  | .....  | A.....        | A.....T.....       | 1370 |
| 45S-U3 28S | .....                                                                                                                                       | AT.....                                                                                 | .....  | G.....  | .....  | A.....        | A.....T.....       | 1370 |
| 45S-S 28S  | .....                                                                                                                                       | G.....                                                                                  | .....  | A.....  | .....  | A.....        | T.....             | 1403 |
|            | 1,440                                                                                                                                       | 1,460                                                                                   | 1,480  | 1,500   | 1,520  | 1,540         | 1,560              |      |
| 45S-M 28S  | <b>AATGCGACCGCCTAGTGGGCCATTTTGGTAAGCAGAAGTGGTCTGCGGGATGAACCGAACGCCGGGTTAAGGCGCCCGATGCCGACGCTCATCAGACCCCATAAAAGGTGTTGGTTGATATAGACAG</b>      |                                                                                         |        |         |        |               |                    | 1548 |
| 45S-U1 28S | .....                                                                                                                                       | GA.....C.....                                                                           | G..... | .....   | C..... | T.....        | .....              | 1500 |
| 45S-U2 28S | .....                                                                                                                                       | GA.....C.....                                                                           | G..... | .....   | C..... | T.....        | .....              | 1500 |
| 45S-U3 28S | .....                                                                                                                                       | GA.....C.....                                                                           | G..... | .....   | C..... | T.....        | .....              | 1500 |
| 45S-S 28S  | .....                                                                                                                                       | GA.....C.....                                                                           | T..... | .....   | C..... | .....         | G.....             | 1533 |
|            | 1,580                                                                                                                                       | 1,600                                                                                   | 1,620  | 1,640   | 1,660  | 1,680         |                    |      |
| 45S-M 28S  | <b>CAGGACGGTGGCCATGGAAGTCGGCACCCGCCAAGGAGTGTGTAACAACCTCACCTGCCGAATCAACTAGCCCTGAAAATGGATGGCCTGGAGCGTCGGGCCCATACCCGGCCGTCGACGGCACAAAGGA</b>   |                                                                                         |        |         |        |               |                    | 1678 |
| 45S-U1 28S | .....                                                                                                                                       | .....                                                                                   | T..... | .....   | .....  | .....         | G.....AG           | 1630 |
| 45S-U2 28S | .....                                                                                                                                       | .....                                                                                   | T..... | .....   | .....  | .....         | G.....AG           | 1630 |
| 45S-U3 28S | .....                                                                                                                                       | .....                                                                                   | T..... | .....   | .....  | G.....        | G.....AG           | 1630 |
| 45S-S 28S  | .....                                                                                                                                       | A.....T.....                                                                            | T..... | .....   | .....  | .....         | G.....AG           | 1663 |
|            | 1,700                                                                                                                                       | 1,720                                                                                   | 1,740  | 1,760   | 1,780  | 1,800         | 1,820              |      |
| 45S-M 28S  | <b>CA-CGCGAGCGGTGCGC-GCGCTGCAAGCCTCGACGAGTAGGAGGGCCGCGCGGTGGCGCCGAAGCCAGGGCGCGGGCCGGTGGAGCCCGCGGGCGCAGATCTTGGTGGTAGTAGCAAATATT</b>          |                                                                                         |        |         |        |               |                    | 1806 |
| 45S-U1 28S | .....                                                                                                                                       | CC.C.CTC.C.GG.G.G-AAAGG.T.....                                                          | .....  | G.....  | T..... | T.....        | A.....             | 1759 |
| 45S-U2 28S | .....                                                                                                                                       | CC.C.CTC.C.GG.G.G-AAAGG.T.....                                                          | .....  | G.....  | T..... | T.....        | A.....             | 1759 |
| 45S-U3 28S | .....                                                                                                                                       | CT.C.CTC.C.GG.G.G-AAAGG.T.....                                                          | .....  | G.....  | T..... | T.....        | A.....             | 1759 |
| 45S-S 28S  | .....                                                                                                                                       | CC.C.CCT.C.GG.G.GGAAAGG.T.....                                                          | .....  | G.....  | T..... | T.....        | T.....             | 1793 |
|            | 1,840                                                                                                                                       | 1,860                                                                                   | 1,880  | 1,900   | 1,920  | 1,940         |                    |      |
| 45S-M 28S  | <b>CAAACGAGAGCTTTGAAGGCCGAAGTGGAGAAGGGTTCATGTGAACAGCAGTTGAACATGGGTGAGCCGGTCTAAGGGACGGGCCTACGCCGTTTCGGAGGGGAGGGCGATGGCCTCTGTGCCCCCG</b>      |                                                                                         |        |         |        |               |                    | 1936 |
| 45S-U1 28S | .....                                                                                                                                       | .....                                                                                   | A..... | .....   | T..... | GA.....T..... | A.....             | 1889 |
| 45S-U2 28S | .....                                                                                                                                       | .....                                                                                   | A..... | .....   | T..... | GA.....T..... | A.....             | 1889 |
| 45S-U3 28S | .....                                                                                                                                       | .....                                                                                   | A..... | .....   | T..... | GA.....T..... | A.....             | 1889 |
| 45S-S 28S  | .....                                                                                                                                       | .....                                                                                   | C..... | T.....  | T..... | GA.....       | A.....A.....C..... | 1923 |
|            | 1,960                                                                                                                                       | 1,980                                                                                   | 2,000  | 2,020   | 2,040  | 2,060         | 2,080              |      |
| 45S-M 28S  | <b>CTCGACCGAAAGGGAGTCGGGTCCAGATCCCCGAGCCCGGAGCGGGCAGCGGGCCGCGAGGCGCCAGTGCAGTGCAGCAAACGAACCCGGAGATGCCGGCGGGTCCCCGGGAAAGAGTTCTCTT</b>         |                                                                                         |        |         |        |               |                    | 2066 |
| 45S-U1 28S | .....                                                                                                                                       | GC.....T.....                                                                           | T..... | A.....  | T..... | .....         | A.....T.....T..... | 2018 |
| 45S-U2 28S | .....                                                                                                                                       | GC.....T.....                                                                           | T..... | A.....  | T..... | .....         | A.....T.....T..... | 2018 |
| 45S-U3 28S | .....                                                                                                                                       | GC.....T.....                                                                           | T..... | A.....  | T..... | .....         | A.....T.....T..... | 2018 |
| 45S-S 28S  | .....                                                                                                                                       | GC.....T.....                                                                           | T..... | A.....  | T..... | .....         | A.....             | 2052 |
|            | 2,100                                                                                                                                       | 2,120                                                                                   | 2,140  | 2,160   | 2,180  | 2,200         |                    |      |
| 45S-M 28S  | <b>TTCTTTGTGAAGGGCAGGGCGCCCTGGAACGGGTTTCGCCCGAGAGAGGGGCCCGGCCCTGAAAGCGCCGCGTCTGGCGGCGTCCGGTGAAGTGCAGTCTCGTGGCCCTTAAAAATCCGGGGGAGAAGGT</b>   |                                                                                         |        |         |        |               |                    | 2196 |
| 45S-U1 28S | .....                                                                                                                                       | .....                                                                                   | T..... | AG..... | .....  | T.....        | A.....GC.....      | 2148 |
| 45S-U2 28S | .....                                                                                                                                       | .....                                                                                   | T..... | AG..... | .....  | T.....        | A.....GC.....      | 2148 |
| 45S-U3 28S | .....                                                                                                                                       | .....                                                                                   | T..... | AG..... | .....  | T.....        | A.....GC.....      | 2148 |
| 45S-S 28S  | .....                                                                                                                                       | .....                                                                                   | T..... | .....   | G..... | C.....        | .....              | 2182 |
|            | 2,220                                                                                                                                       | 2,240                                                                                   | 2,260  | 2,280   | 2,300  | 2,320         | 2,340              |      |
| 45S-M 28S  | <b>GTAATCTCGCGCCGGCCGTACCCATATCCGCAGCAGGTCTCCAAGGTGAACAGCCTCTGGCGTGTGGAACAAGGCAGAGTAAGGGAAGTCGGCAAGTCAGATCCGTAACCTCCGGGATAAGGATTGCG</b>     |                                                                                         |        |         |        |               |                    | 2326 |
| 45S-U1 28S | .....                                                                                                                                       | .....                                                                                   | .....  | .....   | .....  | .....         | .....              | 2277 |
| 45S-U2 28S | .....                                                                                                                                       | .....                                                                                   | .....  | .....   | .....  | .....         | .....              | 2277 |
| 45S-U3 28S | .....                                                                                                                                       | G.....                                                                                  | .....  | .....   | G..... | .....         | .....              | 2277 |
| 45S-S 28S  | .....                                                                                                                                       | G.....                                                                                  | .....  | .....   | .....  | .....         | .....              | 2311 |

# 28S

455-M 28S TCTAAGGGCTGAGCCGGTCTGGGCTGAGGTGCGAAGCGGGCCTGGGCCCGAGCCGCGACTGGGGGAGCGGCCGCCCGAGGTGCCCTGACCCCGTTCCCGAGCCGCGGGGGTGCAGCGCGGTGGCGCGC 2456  
455-U1 28S .....G.....A.....G.....A.T.T...G.....TT.....CCCTG.AT.....T-TT-.....TA-..A-.....T... 2396  
455-U2 28S .....G.....A.....G.....A.T.T...G.....TT.....CCCTG.AT.....T-TT-.....TA-..A-.....T... 2396  
455-U3 28S .....G.....A.....G.....A.T.T...G.....TT.....CCCTG.AT.....T-TT-.....TA-..A-.....T... 2396  
455-S 28S .....G.....A.....G.....C.....G.....C.C.....CC-T..T.....T..T-.....C.GA-.....T... 2428

455-M 28S GGTCCCTCTCTCCCCCGCCGCGTCCGCCCTGGGCTTTTTGCGGTCTCGACTCCCCCGACTCTTCCCTCCGCCCTTTCCCGTCCGCGGGGTGCGGCGGGGGTCTCGGAGGAGGGGGGTGGAAG 2586  
455-U1 28S .....AG...T-.....C.....ATG.G...G.G...A-..GA-..AA.C-.....T..CT-.....A..C...GG-...G..C..AT.TC..T- 2501  
455-U2 28S .....AG...T-.....C.....ATG.G...G.G...A-..GA-..AA.C-.....T..CT-.....A..C...GG-...G..C..AT.TC..T- 2501  
455-U3 28S .....AG...T-.....C.....ACG.G...G.G...A-..GA-..AA.C-.....T..CT-.....A..C...GA-...A-C..AT.TC..T- 2500  
455-S 28S .....A-.....C.....T..G-.....G-.....G-.....C-G-.....C-CT-.....T-.....A-.....C-.....AT.TC..T- 2503

455-M 28S AGGCCGTGGGGAGGAAAGGGTGGTTCGTGGCGTGGGGGGCAACGGGAGGGTCTCGCTGCCGCGCATGCCCTCCGCTGGCCGGGGCCCGCGGGGGCGGGATGCGCAGCGGTTGGCGGCGGCACCC 2716  
455-U1 28S C...T-C.T.T-.CTC-.....G..T...T...T...T...GTCT.T...G-..AA-..A...TGTGTGTA...G.....T.....T.....TG 2613  
455-U2 28S C...T-C.T.T-.CTC-.....G..T...T...T...T...GTCT.T...G-..AA-..A...TGTGTGTA...G.....T.....T.....TG 2613  
455-U3 28S C...T-C.T.T-.CTC-.....G..T...T...T...T...GTCT.T...G-..AA-..A...TGTGTGTA...G.....T.....T.....TG 2611  
455-S 28S C...T-C.T.T-.CTC-.....G..T...G..TA...GTC...G-..C-..GA-..T.....T.....G.ATGC..TGC.GT-..T.....T..... 2612

455-M 28S TGGGCGCGCGCCGCGCCCTTCCCGCGGATCTCCGAGCTACGGCCCCGCGCGGGGGCCGCGTCCGCGCGTGCGCCCCCTCCGGGGAGTGGCGCGC- GGCCT- CG- GC- TCCCCCGGTGCGGGCGCC 2842  
455-U1 28S ...A..A..A.G..G..T..T...C.TCTG.....T...A..TCTGCT.TA...GCTT.T...G...AG.G..TAG.TC.CGGGG..A.TG...T...C.GCGC..T... 2742  
455-U2 28S ...A..A..A.G..G..T..T...C.TCTG.....T...A..TCTGCT.TA...GCTT.T...G...AG.G..TAG.TC.CGGGG..A.TG...T...C.GCGC..T... 2742  
455-U3 28S ...A..A..A.G..G..T..T...C.TCTG.....T...A..TCTGCT.TA...ACTT.T...G...AG.G..TAG.TC.CGGGG..A.TG...T...C.GCGC..T... 2740  
455-S 28S ...A..T.....G.....T.....C.....T...A..TC-CGT.TG...CTT.T..T...G...GAG...A..G-..CGGG-.....T...C.GCGC..... 2733

455-M 28S TCGGCCGCGGC- TAGCAGCAGCTTAGAAGTGTGCGGACCAGGGGAATCCGACTGTTTAAATTAACAAGCATCGCGAAGCCCTCGGCGGGTGTGACGCGATGTGATTTCTGCCAGTGTCTGA 2971  
455-U1 28S .....TAAGA.T..... 2872  
455-U2 28S .....TAAGA.T..... 2872  
455-U3 28S .....TAAGA.T.....A..... 2870  
455-S 28S .....C-..T.....TG.....GT.....GT..... 2862

455-M 28S ATGTCAAAGTGAAGAAATCAACGAAGCGCGGGTAAACGGCGGGAGTAACCTATGACTCTCTTAAGGTAGCCAAATGCCTCGTCACTAATTAGTGACGCGCATGAATGGATGAACGAGATCCCACCTGTC 3101  
455-U1 28S ..... 3002  
455-U2 28S ..... 3002  
455-U3 28S ..... 3000  
455-S 28S .....T..... 2992

455-M 28S CCTACCTGCTATCTAGCGAAACCACAGCCAAGGGAACGGGCTTGGCAGAATCAGCGGGGAAAGAACCCCTGTTGAGCTTGACTCTAGTCTGGCCCTGTGAAGAGACATGAGGGGTGTAAGAATAAGTGGG 3231  
455-U1 28S .....A..... 3132  
455-U2 28S .....A..... 3132  
455-U3 28S .....A..... 3130  
455-S 28S .....A..... 3122

455-M 28S AGGCCCGGGCTTCCCGGGCGCGCCGCGGTGAAATACCACTACTCTTATCGTTTCTCACTTACCCGGTGAGGCGGGAAAGCCGGCGTCCCCGCGGGGGCCGCCCTGCTTCTGGCGTCAAGCGC 3361  
455-U1 28S .....A.....T.....A.....G.TT...T.G.T.TT..TCA.T..TCT...C.....T..... 3262  
455-U2 28S .....A.....T.....A.....G.TT...T.G.T.TT..TCA.T..TCT...C.....T..... 3262  
455-U3 28S .....A.....T.....A.....G.TT...T.G.T.TT..TCA.T..TCT...C.....T..... 3260  
455-S 28S .....TG...CCT.G..C..A..G.G..CC.CGGTGA..A...CAC...-..C.TA..GT..C.T.AC.T.CC...TTGG..A...A.G.GAG.CC.C..C.GGCT..T- 3249

455-M 28S CCGGGGGCGTGCGGGGGGTGGGGGCAACCCCTTCCCTCCCGCGCGCCGACCGGGGCGCGACCCGCCCGGGGACAGCGTCAGGTGGGAGTTTACTGGGGCGGTACACCTGTCAAACGGTAACGC 3491  
455-U1 28S .....A..A..A.....T..... 3356  
455-U2 28S .....A..A..A.....T..... 3356  
455-U3 28S .....A..A..A.....T..... 3354  
455-S 28S .....T.....C-C.AT-.....G-.....G-GT-.....CC-..G-.....T.....T.G..... 3344
